# Supplementary material for: DNA-mediated adjuvant immunotherapy extends survival in two different mouse models of myeloid malignancies
Source: PubMed Central journal article supplement (PMC4741708; doi:10.18632/oncotarget.5572), 2015-09-10
Supplement: oncotarget-06-32494-s001.pdf [file oncotarget-06-32494-s001.pdf]

## DNA-mediated adjuvant immunotherapy extends survival in two different mouse models of myeloid malignancies

### Supplementary Material

#### Table S1. Statistical analysis of APL survival curve Figure 1B

Log-rank (Mantel-Cox) test was used to compare the percent survival of different groups. Prism software was used for the Mantel-Cox (log-rank) analysis

|                              | log-rank (Mantel-Cox) |          |
|------------------------------|-----------------------|----------|
|                              | Chi-2 value           | p value  |
| ATRA+pVAX14 vs Placebo       | 70.96                 | P<0.0001 |
| ATRA+pVAX14 vs ATRA          | 10.14                 | P<0.0014 |
| ATRA+pVAX14 vs PVAX14        | 58.51                 | P<0.0001 |
| ATRA+pVAX14 vs ATRA+PML-RARA | 0.56                  | P<0.46   |
| ATRA+PML-RARA vs Placebo     | 55.45                 | P<0.0001 |
| ATRA+PML-RARA vs ATRA        | 15.52                 | P<0.0001 |
| ATRA+PML-RARA vs pVAX14      | 45.16                 | P<0.0001 |
| pVAX14 vs Placebo            | 4.9                   | P<0.03   |
| pVAX14 vs ATRA               | 35.88                 | P<0.0001 |
| ATRA vs Placebo              | 46.07                 | P<0.0001 |

**Table S2. Primer sequences for open reading frames (ORFs), *MyD88*, *PML-RARA* and *ABL***

| <b>Primer</b>    | <b>Sequence (5'→3')</b>          | <b>Amplicon<br/>bp</b> |
|------------------|----------------------------------|------------------------|
| <b>ORF1-F</b>    | <b>ATGCGATGTTTCGCTTGGTGGTCGA</b> | <b>108</b>             |
| <b>ORF1-R</b>    | <b>TCACCTTGCTCCTGCCGAGAAAGTA</b> |                        |
| <b>ORF2-F</b>    | <b>ATGTTTCGCTTGGTGGTCGAATGGG</b> | <b>108</b>             |
| <b>ORF2-R</b>    | <b>TCATCTCACCTTGCTCCTGCCGAGA</b> |                        |
| <b>ORF3-F</b>    | <b>ATGACAGGAGATCCTGCCCC</b>      | <b>63</b>              |
| <b>ORF3-R</b>    | <b>TCACTGAAGCGGGAAGGGAC</b>      |                        |
| <b>ORF5-F</b>    | <b>ATGCCTGCTATTGTCTTCCCAATCC</b> | <b>180</b>             |
| <b>ORF5-R</b>    | <b>CTATTGTCTTCCCAATCCTCCCCCG</b> |                        |
| <b>ORF6-F</b>    | <b>ATGCAATTCCTCATTATTATTAGGA</b> | <b>189</b>             |
| <b>ORF6-R</b>    | <b>TTACCAGAGGGCGCCCCAGCTGGCA</b> |                        |
| <b>hABL-F</b>    | <b>TTCAGCGGCCAGTAGCATCTGACTT</b> | <b>263</b>             |
| <b>hABL-R</b>    | <b>GATGTAGTTGCTTGGGACCCA</b>     |                        |
| <b>mAbl-F</b>    | <b>GAAGACCTTGAAGGAGGACACCATG</b> | <b>183</b>             |
| <b>mAbl-R</b>    | <b>GGGTACACACCCTAGCAGCT</b>      |                        |
| <b>PMLRARA-F</b> | <b>GTCTTCCTGCCCAACAGCAACC</b>    | <b>190</b>             |
| <b>PMLRARA-R</b> | <b>CTCACAGGCGCTGACCCCATAGT</b>   |                        |
| <b>MyD88-F</b>   | <b>CGCGCATCGAGGAGGACTGC</b>      | <b>156</b>             |
| <b>MyD88-R</b>   | <b>CCGGCGTTTGTCTAGGGGGT</b>      |                        |

**Table S3. Peptide sequences predicted by open reading frames (ORFs) of pVAX14**

1, peptide 1 (ORF 1); 2, peptide 2 (ORF 2); 3, peptide 3 (ORF 3); 4, peptide 4 (ORF 4); 5, peptides 5.2, 5.3 (ORF 5); peptides 6.1, 6.2 6.3 (ORF 6). As the predicted peptides of ORFs 5 and 6 were too large to synthesize 3 overlapping peptides were designed and synthesized for each of these ORFs; overlapping sequences are shown in bold

| ORF | Peptide N° | location | Amino Acid Sequence                 |
|-----|------------|----------|-------------------------------------|
| 1   | 1          | 787      | MRCFAWWSNGQVAGSSVCSRRIASAMMDTFSAGAR |
| 2   | 2          | 792      | MFRLVVEWAGSRIKRMQPPHCISHDGYFLGRSKVR |
| 3   | 3          | 896      | MTGDPAPALRPIAASPFPLQ                |
| 4   | 4          | 1207     | MRNDPHPVS                           |
| 5   | 5-1        | 1406     | <b>MPAIVFPILPLAVLPHPTPQNRMTPTQT</b> |
|     | 5-2        |          | <b>PTPQNRMTPTQTMRCNFLILLGKDSGSG</b> |
|     | 5-3        |          | <b>NFLILLGKDSGSGTFQGQGRHGGGLGRQ</b> |
| 6   | 6-1        | 1495     | <b>MQFPHFIRKGQWEWHLPGSRKARGRIGK</b> |
|     | 6-2        |          | <b>GSRKARGRIGKTIAGMLGMRWALWLLL</b>  |
|     | 6-3        |          | <b>GMRWALWLLLGGFMDSKRTGIASWGALW</b> |

**A**

```

GC TGTCTCGCGATGTACGGCCAGATACGCGTTGACATTGATTATTAGTAGTATTATAAGTAATCAATTACGGGGTCATTAGTTCATAGCCCATAT
ATGGAGTTCGGCTTACATAACTTACGGTAAATGGCCCGCTGGCTGACCGCCCAACGACCCCGCCCATTTGACGTCAATATGACGTATGTTCCCATAG
TAACGCCAATAGGACTTTCATTGACGTCAATGGGTGGAGTATTACGGTAAACTGCCACTTGGCAGTACATCAAGTGTATCATATGCCAAGTACGCC
CCCTATTGACGTCAATGACGGTAAATGGCCCGCTGGCATATGCCAGTACATGACCTTATGGGACTTTCCTACTTGGCAGTACATACGTATTAGTC
ATCGCTATTACCATGGTGTATGGGTTTTGGCAGTACATCAATGGGGTGGATAGCGGTTTGGACTCGGGGATTCCAGTCCACCCCATTTGACGTCA
ATGGGAGTTGTTTTGGCACCAAAATCAACGGGACTTCCAAAATGTCGTAACAACCTCCGCCCATTTGACGCAATGGGGGTAGCGGTGACGGTGGGA
GGCTTATAAGCAGAGCTCTCTGGCTAACGTAGAGAACCAGTCTTACTGGCTTATCGAAATTAATACGACTCACTATAGGAGAGCCCAAGCTGGCTAG
CGTTTTAACTTAAGCTTGGTACCAGCTCGGATCAGATCATCTGTGATGCAAGAAGCCGCTTCGATCCGAGTACGTGCTCGGCTCGATCGATGTTTCGG
TTGGTGGTGGAAATGGCAGGTAGCCGGATCAAGCGTATGAGCCCGCCGATTCATCAGCCATGATGGATCTTCTGGCAGGAGTGCATGATGAG
AGGAGTCCCGCCGCTTCGCCCAATAGCAGCCAGTCCCTCCCGCTTCAGTGCAGAGCAGCTCGCGCAAGGAACGCCGTCGCTGGCCAA
GCCACGATAGCCCGCTGCTGCTTTGCGATTCAATCAGGGCACCGGACAGTTCGGTCTTGACAAAAGAACCGGGCCCGCTGCGCTGACAGCGGAA
CACCGCCATCAGGCGAGCCGCTTGTGTTGTCGCCAGTATAGCCGATAGCCCTCCACCCAAAGCGGGGAGAACCTGCGTCAATCCATCTTGT
TCATCTATGCACTCTCATCTGCTTCTTGATCAGAGCTTGTATCCCTGCCCATCAGATCCTTGGCGGAGAAAGCCATCCAGTTTACTTTGCG
AGGGTCCCAACCTTACAGAGGGCCCGCCAGCTGGCAATTCGGTTGCTGCTGCTCAATAAACCCGAGTAGAAGCCATAGAGCCCAAGCCGATCC
CCAGATGCTGCTATTTGCTTCCCAATCTCCCGCTTGGTCTGCTGCCACCCAGCCAGAAAGAAATGACACTACTCAGACAATGCCATGCAAA
TTTCTCATTATATAGGAAGGACAGTGGGAGTGGCAGCTTCCAGGCTCAAGGAGGACAGCGGGAGGATTGGGAGACAAATACAGGCTCTGGGGA
TCCGGTGGCTCTATGSCCTTCTAGCCGCTTATGGAGCAGCAAGCAACCGAATTTGCCAGTGGGGCCCTCTGTAAGTTGGGAAGCCCTGCA
AAGTAACTGGATGGCTTCTTCCGCCAGATGATGAGCGCAGGGATCAAGCTCTGATCAAGAGCAGGATGAGGATCGTTCCGATGATTGAACA
AGATGATTTGCAAGCAGGTTCTCCGCCGCTTGGGTGGAGAGCTATTCCGGTATGACTGGGCACAACAGACAATCGGCTGCTGATGCCCGCTGTC
CGGCTGACAGCCAGGGCCCGCCGCTTCTTTTGTCAAGCCAGCTCTCCGCTGCCCTGAATGACTCAAGAGCAGGACCGCGGCTATCGTGGCTGG
CCACGACCGGCTTCTTCCGCACTGTGCTGAGTGAAGCCGCTTGTCTGATCAGAGTATGATTCGACGAAGAGCATCAGGGGCTCGCCAGCCGAACTGT
ATCTCACCCTGCTTCCCGGAAAGATATCCATCATGGCTGATGCAATGCGGCTGCTCATGCTGATCCGCTACTCGCCATTTCAGCACCAAGCG
AAACATCGATCGAGCAGCAGTACTCGGATGGAAGCCGCTTGTGATCAGAGTATGATTCGACGAAGAGCATCAGGGGCTCGCCAGCCGAACTGT
TCGCCAGCTCAAGCGAGCATGCGCCAGCGGAGGATCTGCTGACCCATGCGCATGCTGCTTCCGCAATATCATGGTGGAAAATGGCCGCTTTC
TGGATTCATCGACTGTTGGCCGCTGGGTGGCCGACCGCTATCAGGACATAGCCTTGGCTACCCGTGATATTGCTGAAGAGCTTGGCGCGAATGGCT
GACCGCTTCCGCTTACGGTTACGGTATCCGCGCTCCGATTCGCGAGCCGATCGCTTCTATCGCTTCTGACGAGTCTTCTGAATTAACGCTTACA
ATTTCTGATGCGGTTATTTCTCTTACGCACTGTCGCGTATTTACACCCGATCAGGTGGCAGTTTTCCGGGAAATGTGGCGGAAACCCCTATTTGTT
TATTTTTCTAAATACATTAATATGATATCCGCTATGAGACAATAACCCGTATAAATGCTTCAATAATGACAGTGGTAAACTTCAATTTTTAATTTAA
AAGGATATAGTGAAGATCTTTTTGATAATCTCATGACAAAATCCCTTAACGTTGATTTTCCGCTCAAGCGTCAAGCCCGTAGAAAAGATCAAA
GGATCTTCTGAGATCCTTTTTTCTGGCGTAATCTGCTGCTTGCAAAACAAAACCCAGCCGATCCAGCGGTGGTTTTGTTCCGGATCAAGAGCTAC
CAACTTTTTCCGAAAGTAACTGGCTTCAGCAGAGCGGAGATACAAAATCTGTTCTTCTAGTGTAGCCGTAGTTAGGCCAACACTCAAGAATCTGT
AGCACCCTACATACCTGCTCTGCTAACTCTGTTACAGTGGCTGCTGCTGCTGCTGCTGCTGCTGCTGCTGCTGCTGCTGCTGCTGCTGCTGCTGCT
CCGATAAAGCGCAGCGGTCGGCTGAAACGGGGGTTCTGTCACACAGCCAGCTTGGAGCGAAGCACTACACCGAATAGATACCTACAGCGTGAGC
TATGAGAAAAGCGCCAGCTTCCGGAAGGGAGAAAAGGGGACAGGTATCCGTAAGCGGAGGGTGGAAACAGGAGAGCGCAGGAGGGAGCTTCCAGGGG
AAACGCTGATCTTTATAGTCTGCTGGGTTTCCGCACTCTGACTGAGCGTGGATTTTGTGATGCTGCTGAGGGGGCGGAGCTTGAAGAAAAC
GCCAGCAAGCGGCTTTTTAGGGTCTCGCCCTTTTGTGGCTTTTTGCTCAGATGTTCTT

```

100  
200  
300  
400  
500  
600  
700  
800  
900  
1000  
1100  
1200  
1300  
1400  
1500  
1600  
1700  
1800  
1900  
2000  
2100  
2200  
2300  
2400  
2500  
2600  
2700  
2800  
2900  
3000  
3100  
3200  
3300  
3400  
3500  
3562

pVax1  
ORF 1  
ORF 2  
ORF 3  
Insert  
ORF 4  
ORF 5  
ORF 6  
Kan<sup>r</sup>  
pVax1

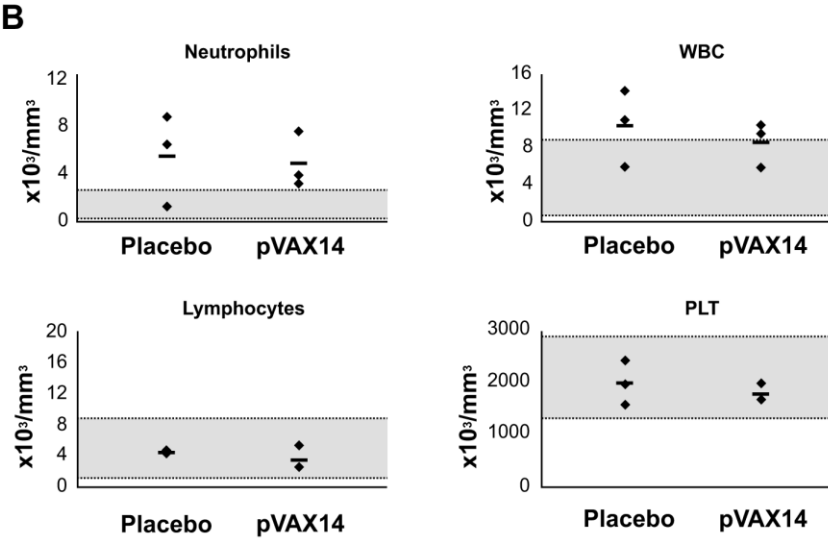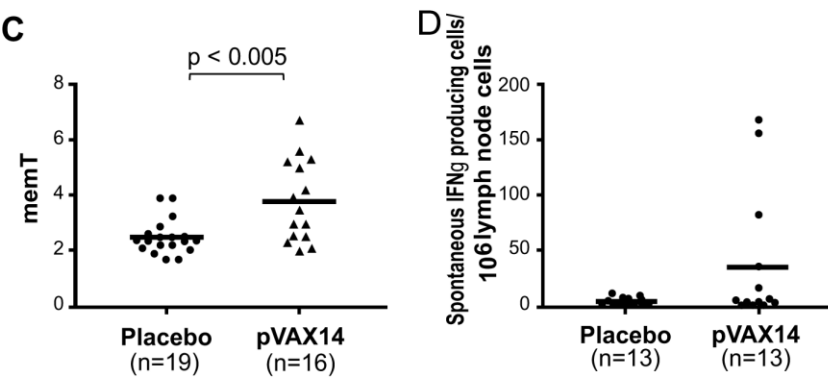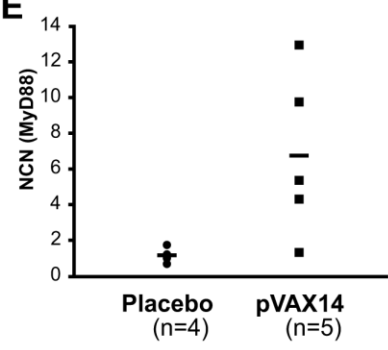

## Supplementary Figure S1. Characteristics of pVAX14

A) Sequence of pVAX14 plasmid showing functional domains; grey highlighted sequences from the kanamycin (Kan) resistance gene in the antisense orientation and reversed (Kan insert originally in pVAX1 nucleotides 1226-1701), - in italics and underlined in dashed, the GC-rich sequences, - in white, the mouse and human specific consensus CpG sequences, the open reading frames (ORFs) are underlined with the start codons in bold italics, the pVAX1 sequences in the insert were originally pVAX1 nucleotide nos. 873-1225, the BamHI site (GGATC) in the multiple cloning site just precedes the insert. The entire insert of pVAX1 nucleotides 873-1701 was inverted (the antisense strand was reversed and now the coding strand) and inserted between pVAX1 nucleotide position 734 and 998; B) peripheral blood (PB) counts of normal FVB/N mice immunized with control placebo phosphate buffered saline (PBS) or pVAX14 DNA (50 µg) on day 35 of protocol illustrated on Figure 3C. The normal range is delineated in grey; C) PB memory T-cells (memT) (defined as percentage (%) of CD44<sup>hi</sup>/CD62L<sup>lo</sup> within the CD4<sup>+</sup> population) were measured on day 40. Controls were mice treated with placebo hepes buffered saline (HBSS); significant differences were observed between pVAX14 and the control ( $p < 0.005$ ); D) interferon gamma (IFN $\gamma$ ) producing cells in normal mice treated with control placebo (HBSS) and pVAX14. ELISPOT assays were undertaken on day 40 showing no significant difference between pVAX14 and placebo; E) *MyD88* expression of pVAX14 was similar to control placebo (HBSS). Nonparametric, unpaired, two tailed, student t-test was used to compare different groups. Prism software was used for the t-test analysis.

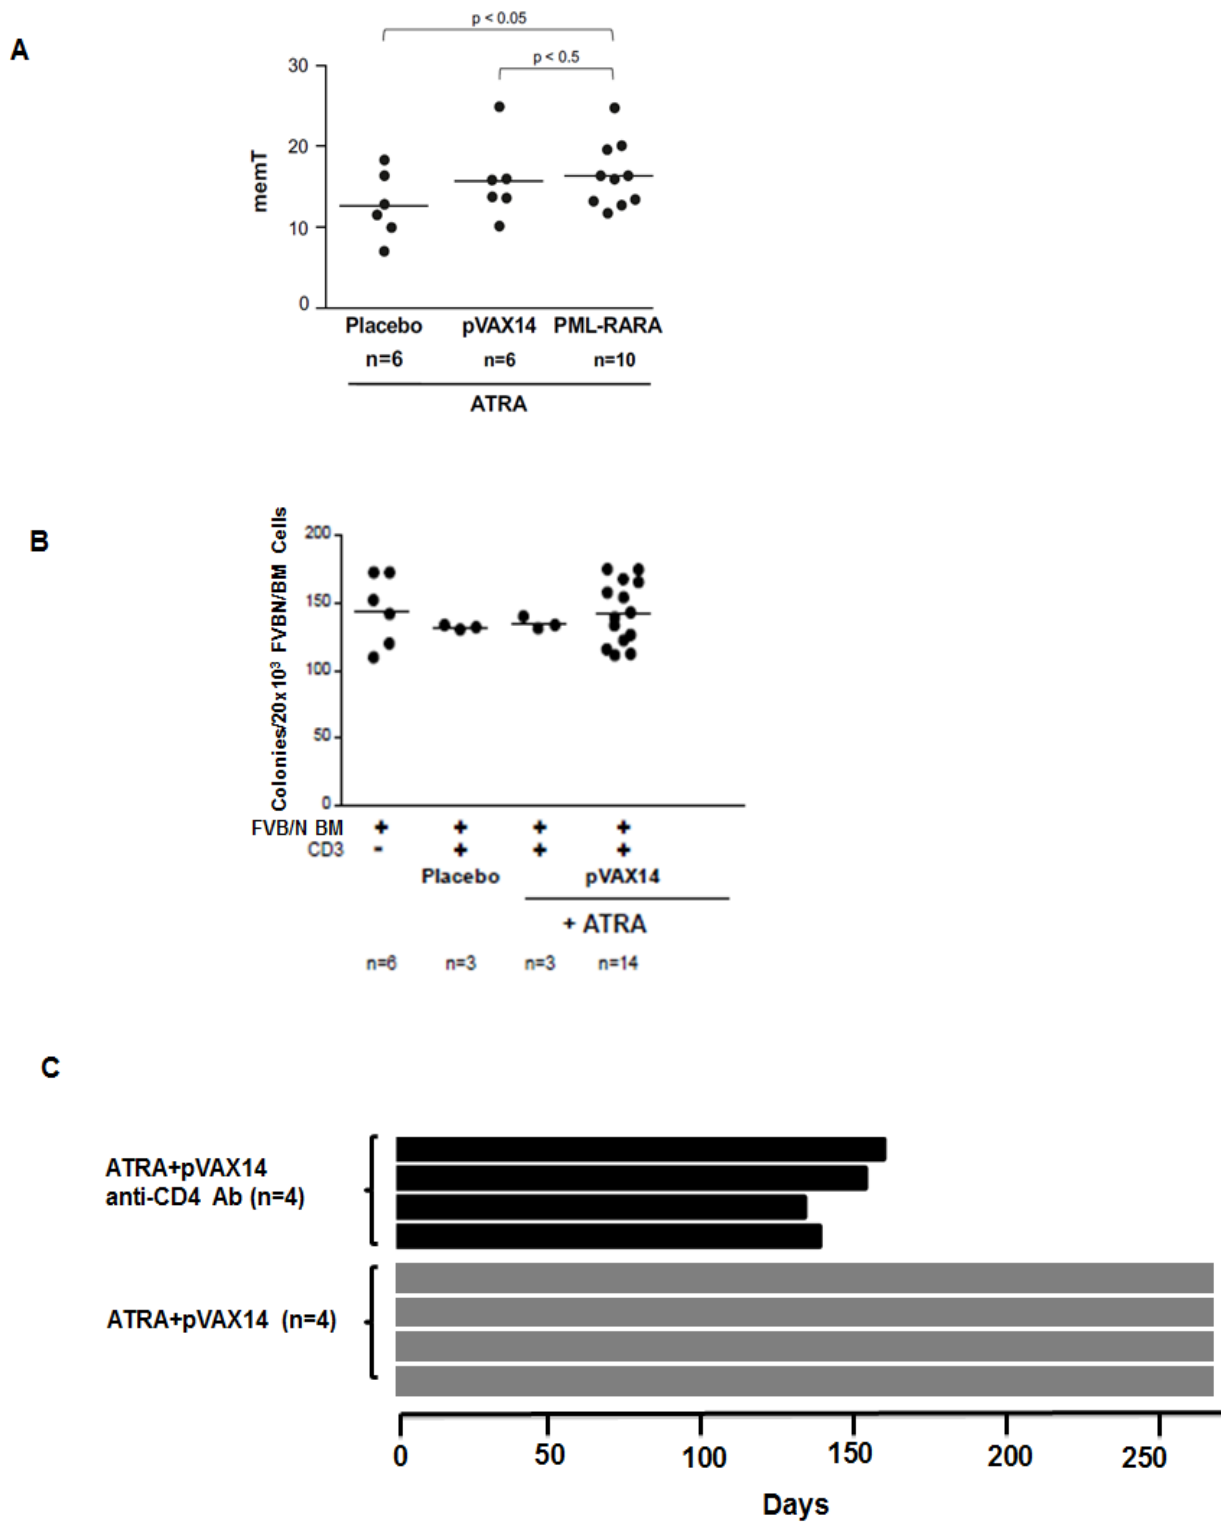

**Figure S2 DNA-based immunotherapy induced responses**

**A)** Increase in memory T-cells (memT) of pVAX14 or *PML-RARA* -treated APL mice measured on day 40; **B)** CD3<sup>+</sup> effectors from APL mice treated as shown showing no effect on FVB/N progenitors plated at an effector:target (E:T) of 10:1; **C)** The protective effect mediated by ATRA+ pVAX14 in APL mice is CD4<sup>+</sup> T-cell dependent. Long term survivors (LTS) from ATRA+pVAX14-treated mice were CD4-depleted by weekly injections of CD4-specific antibody started on day 120 after engraftment of leukemic cells. Control ATRA+pVAX14 treated mice were followed up for >500 days. Nonparametric, unpaired, two tailed, Mann-Whitney test was used to compare different groups. Prism software was used for the t-test analysis.
